# Supplementary material for: The cyclopropylcarbinyl route to γ-silyl carbocations
Source: publisher site journal article supplement (doi:10.3762/bjoc.15.170), 2019-07-24
Supplement: Additional file 2 [file 1860-5397-15-170-S2.pdf]

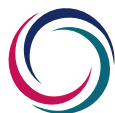

## Supporting Information

for

### The cyclopropylcarbiny route to $\gamma$ -silyl carbocations

Xavier Creary

*Beilstein J. Org. Chem.* **2019**, *15*, 1769–1780. [doi:10.3762/bjoc.15.170](https://doi.org/10.3762/bjoc.15.170)

**M062X/6-611+G\*\* calculated structures, energies, and Cartesian coordinates for carbocations and transition states**

M062X/6-311+G\*\* Calculated<sup>1</sup> Structures, Energies, and Cartesian Coordinates for Carbocations and Transition States, as well as B3LYP/6-31G\* Calculated<sup>2</sup> Structures and NMR Spectra of **17** and **18**

1. Frisch, M. J.; Trucks, G. W.; Schlegel, H. B.; Scuseria, G. E.; Robb, M. A.; Cheeseman, J. R.; Scalmani, G.; Barone, V.; Mennucci, B.; Petersson, G. A.; Nakatsuji, H.; Caricato, M.; Li, X.; Hratchian, H. P.; Izmaylov, A. F.; Bloino, J.; Zheng, G.; Sonnenberg, J. L.; Hada, M.; Ehara, M.; Toyota, K.; Fukuda, R.; Hasegawa, J.; Ishida, M.; Nakajima, T.; Honda, Y.; Kitao, O.; Nakai, H.; Vreven, T.; Montgomery, Jr., J. A.; Peralta, J. E.; Ogliaro, F.; Bearpark, M.; Heyd, J. J.; Brothers, E.; Kudin, K. N.; Staroverov, V. N.; Kobayashi, R.; Normand, J.; Raghavachari, K.; Rendell, A.; Burant, J. C.; Iyengar, S. S.; Tomasi, J.; Cossi, M.; Rega, N.; Millam, J. M.; Klene, M.; Knox, J. E.; Cross, J. B.; Bakken, V.; Adamo, C.; Jaramillo, J.; Gomperts, R.; Stratmann, R. E.; Yazyev, O.; Austin, A. J.; Cammi, R.; Pomelli, C.; Ochterski, J. W.; R. L. Martin, K. Morokuma, V. G. Zakrzewski, G. A. Voth, Salvador, P.; Dannenberg, J. J.; Dapprich, S.; Daniels, A. D.; Farkas, O.; Foresman, J. B.; Ortiz, J. V.; Cioslowski, J.; D. J. Fox, D. J. Gaussian 09, Revision A.02, Gaussian, Inc., Wallingford CT, 2009.

2. *Spartan'14* Wavefunction, Inc. Irvine, CA.

M062X/6-311+G\*\* Optimized Structure and Energy of Cation **24**

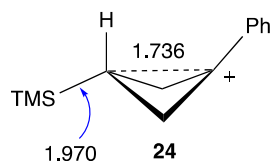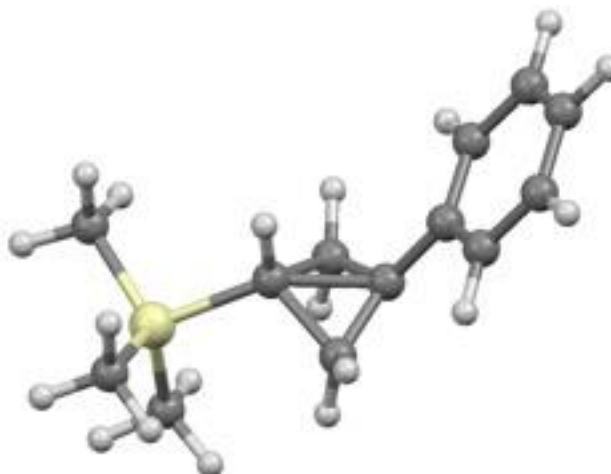

E(RM062X) = -795.9495326  
 Zero-point correction = 0.282375 au  
 No imaginary frequencies

| Center Number | Atomic Number | Atomic Type | Coordinates (Angstroms) |           |          |
|---------------|---------------|-------------|-------------------------|-----------|----------|
|               |               |             | X                       | Y         | Z        |
| 1             | 1             | 0           | 0.463960                | 1.907745  | 1.598640 |
| 2             | 6             | 0           | 0.656405                | 1.416046  | 2.544061 |
| 3             | 6             | 0           | 0.636476                | -0.171308 | 2.611264 |
| 4             | 6             | 0           | -0.469592               | 0.953347  | 3.336810 |
| 5             | 6             | 0           | 0.116752                | -0.125344 | 4.112927 |
| 6             | 1             | 0           | -0.524733               | -0.920603 | 4.471888 |
| 7             | 1             | 0           | 0.943317                | 0.123242  | 4.772790 |
| 8             | 1             | 0           | 1.524561                | 1.788187  | 3.080711 |
| 9             | 6             | 0           | -1.875324               | 1.063906  | 2.966243 |
| 10            | 1             | 0           | -0.037857               | -0.654034 | 1.906489 |
| 11            | 14            | 0           | 2.426082                | -0.978809 | 2.454308 |
| 12            | 6             | 0           | 3.585105                | -0.018279 | 3.554554 |
| 13            | 6             | 0           | 2.186109                | -2.738498 | 3.013437 |
| 14            | 6             | 0           | 2.847560                | -0.816058 | 0.648287 |
| 15            | 1             | 0           | 4.558302                | -0.519089 | 3.533532 |
| 16            | 1             | 0           | 3.274065                | 0.010128  | 4.601434 |
| 17            | 1             | 0           | 3.751790                | 1.003754  | 3.207340 |
| 18            | 1             | 0           | 3.830012                | -1.256340 | 0.456322 |
| 19            | 1             | 0           | 2.890170                | 0.229416  | 0.333772 |
| 20            | 1             | 0           | 2.125447                | -1.338535 | 0.016651 |
| 21            | 1             | 0           | 3.121228                | -3.294249 | 2.902027 |
| 22            | 1             | 0           | 1.428126                | -3.250585 | 2.416110 |
| 23            | 1             | 0           | 1.895010                | -2.796013 | 4.065027 |
| 24            | 6             | 0           | -4.569552               | 1.327899  | 2.313253 |
| 25            | 6             | 0           | -2.847628               | 0.334665  | 3.667368 |
| 26            | 6             | 0           | -2.273931               | 1.950375  | 1.954233 |
| 27            | 6             | 0           | -3.614311               | 2.074918  | 1.627541 |
| 28            | 6             | 0           | -4.186777               | 0.464324  | 3.336865 |
| 29            | 1             | 0           | -2.565116               | -0.319517 | 4.482696 |
| 30            | 1             | 0           | -1.544362               | 2.555608  | 1.430948 |
| 31            | 1             | 0           | -3.917443               | 2.760769  | 0.846675 |
| 32            | 1             | 0           | -4.933655               | -0.098503 | 3.882204 |
| 33            | 1             | 0           | -5.617662               | 1.430804  | 2.059147 |

M062X/6-311+G\*\* Optimized Structure and Energy of Cation **27**

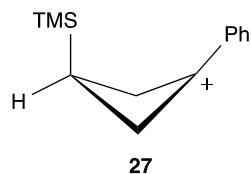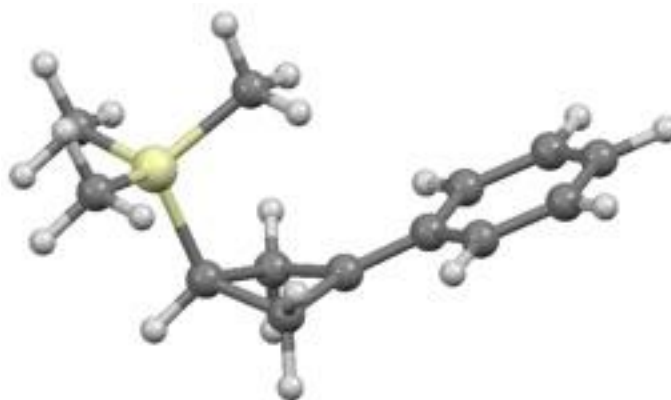

E(RM062X) = -795.9378959  
 Zero-point correction = 0.280682 au  
 No imaginary frequencies

| Center Number | Atomic Number | Atomic Type | Coordinates (Angstroms) |           |           |
|---------------|---------------|-------------|-------------------------|-----------|-----------|
|               |               |             | X                       | Y         | Z         |
| 1             | 1             | 0           | 0.633899                | 1.855121  | -0.936018 |
| 2             | 6             | 0           | 0.728437                | 1.708920  | 0.141422  |
| 3             | 6             | 0           | 1.144323                | 0.369704  | 0.623405  |
| 4             | 6             | 0           | -0.533041               | 1.536594  | 1.061014  |
| 5             | 6             | 0           | 0.265992                | 0.415716  | 1.817206  |
| 6             | 1             | 0           | -0.212919               | -0.512894 | 2.132673  |
| 7             | 1             | 0           | 0.805748                | 0.845705  | 2.669877  |
| 8             | 1             | 0           | 1.391020                | 2.482250  | 0.549119  |
| 9             | 1             | 0           | -0.740306               | 2.410889  | 1.678550  |
| 10            | 14            | 0           | -2.099951               | 0.923355  | 0.155118  |
| 11            | 1             | 0           | 3.921363                | -3.497329 | -1.593939 |
| 12            | 6             | 0           | 1.853430                | -0.671409 | 0.015740  |
| 13            | 6             | 0           | -3.360471               | 0.451444  | 1.450897  |
| 14            | 6             | 0           | -2.698880               | 2.306637  | -0.948765 |
| 15            | 6             | 0           | -1.583192               | -0.574460 | -0.860394 |
| 16            | 1             | 0           | -0.827556               | -0.334165 | -1.614294 |
| 17            | 1             | 0           | -2.452876               | -0.961350 | -1.398880 |
| 18            | 1             | 0           | -1.205178               | -1.394549 | -0.242620 |
| 19            | 1             | 0           | -3.004297               | -0.356354 | 2.095552  |
| 20            | 1             | 0           | -4.284906               | 0.108341  | 0.979735  |
| 21            | 1             | 0           | -3.613576               | 1.303124  | 2.087218  |
| 22            | 1             | 0           | -1.955320               | 2.583468  | -1.700732 |
| 23            | 1             | 0           | -2.940124               | 3.200965  | -0.368841 |
| 24            | 1             | 0           | -3.604884               | 2.007342  | -1.481569 |
| 25            | 6             | 0           | 3.340902                | -2.701508 | -1.140091 |
| 26            | 6             | 0           | 2.496055                | -0.459500 | -1.230516 |
| 27            | 6             | 0           | 1.972364                | -1.924580 | 0.668767  |
| 28            | 6             | 0           | 2.715066                | -2.930543 | 0.090437  |
| 29            | 6             | 0           | 3.236355                | -1.472081 | -1.800319 |
| 30            | 1             | 0           | 2.404519                | 0.501177  | -1.724204 |
| 31            | 1             | 0           | 1.481689                | -2.080547 | 1.622663  |
| 32            | 1             | 0           | 2.816117                | -3.890953 | 0.578988  |
| 33            | 1             | 0           | 3.733873                | -1.323222 | -2.749845 |

M062X/6-311+G\*\* Optimized Structure and Energy of Transition State **28**

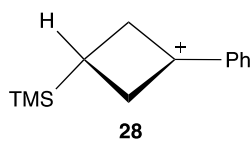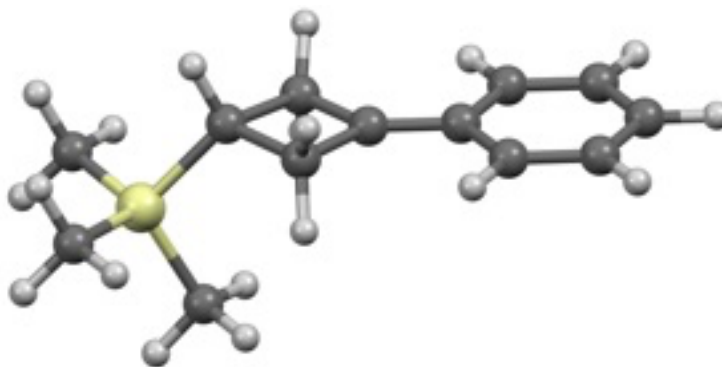

E(RM062X) = -795.9339923  
 Zero-point correction = 0.280551 au  
 One imaginary frequency at -33.97 cm<sup>-1</sup>

| Center Number | Atomic Number | Atomic Type | Coordinates (Angstroms) |           |           |
|---------------|---------------|-------------|-------------------------|-----------|-----------|
|               |               |             | X                       | Y         | Z         |
| 1             | 1             | 0           | -0.127681               | -0.068635 | -0.164709 |
| 2             | 6             | 0           | 0.021315                | -0.007263 | 0.918759  |
| 3             | 6             | 0           | 0.701505                | -1.221598 | 1.626352  |
| 4             | 6             | 0           | -1.211246               | -0.265669 | 1.712313  |
| 5             | 6             | 0           | -0.602932               | -1.395539 | 2.466677  |
| 6             | 1             | 0           | -1.148996               | -2.339949 | 2.367832  |
| 7             | 1             | 0           | -0.517547               | -1.179766 | 3.540460  |
| 8             | 1             | 0           | 0.453524                | 0.979842  | 1.132475  |
| 9             | 6             | 0           | -2.480710               | 0.312552  | 1.718942  |
| 10            | 1             | 0           | 0.841213                | -2.054883 | 0.935329  |
| 11            | 14            | 0           | 2.318050                | -0.882380 | 2.582692  |
| 12            | 6             | 0           | 1.998147                | 0.559267  | 3.746404  |
| 13            | 6             | 0           | 2.734723                | -2.430180 | 3.546206  |
| 14            | 6             | 0           | 3.630508                | -0.439476 | 1.326133  |
| 15            | 1             | 0           | 2.910375                | 0.776182  | 4.309243  |
| 16            | 1             | 0           | 1.219876                | 0.345920  | 4.484394  |
| 17            | 1             | 0           | 1.730271                | 1.479698  | 3.220204  |
| 18            | 1             | 0           | 4.582129                | -0.230269 | 1.821319  |
| 19            | 1             | 0           | 3.359153                | 0.451693  | 0.753478  |
| 20            | 1             | 0           | 3.799596                | -1.256602 | 0.620445  |
| 21            | 1             | 0           | 3.655080                | -2.290657 | 4.118948  |
| 22            | 1             | 0           | 2.886771                | -3.284921 | 2.882446  |
| 23            | 1             | 0           | 1.945532                | -2.689849 | 4.257194  |
| 24            | 6             | 0           | -4.999893               | 1.458736  | 1.730947  |
| 25            | 6             | 0           | -3.480317               | -0.179711 | 2.598398  |
| 26            | 6             | 0           | -2.773378               | 1.392424  | 0.845327  |
| 27            | 6             | 0           | -4.028501               | 1.959150  | 0.855657  |
| 28            | 6             | 0           | -4.732060               | 0.394533  | 2.600363  |
| 29            | 1             | 0           | -3.248866               | -1.005655 | 3.261981  |
| 30            | 1             | 0           | -2.004371               | 1.761933  | 0.175861  |
| 31            | 1             | 0           | -4.266708               | 2.782785  | 0.195202  |
| 32            | 1             | 0           | -5.504571               | 0.029947  | 3.264907  |
| 33            | 1             | 0           | -5.987174               | 1.907528  | 1.735291  |

M062X/6-311+G\*\* Optimized Structure and Energy of Cation **37**

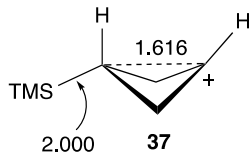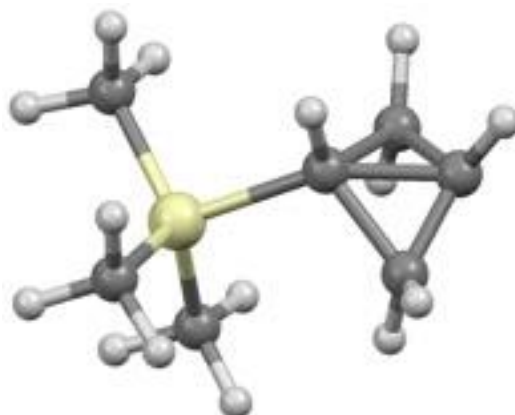

E(RM062X) = -564.9201042  
 Zero-point correction = 0.201629 au  
 No imaginary frequencies

| Center Number | Atomic Number | Atomic Type | Coordinates (Angstroms) |           |           |
|---------------|---------------|-------------|-------------------------|-----------|-----------|
|               |               |             | X                       | Y         | Z         |
| 1             | 1             | 0           | 1.110896                | 0.968829  | -1.087551 |
| 2             | 6             | 0           | -0.634320               | -0.879830 | -0.328303 |
| 3             | 1             | 0           | -1.326724               | -1.585184 | 0.114867  |
| 4             | 6             | 0           | 0.419555                | -0.359066 | 0.496999  |
| 5             | 1             | 0           | -0.466209               | -0.978178 | -1.395538 |
| 6             | 6             | 0           | -0.760384               | 0.662235  | 0.076927  |
| 7             | 1             | 0           | -1.253145               | 0.914478  | 1.011849  |
| 8             | 6             | 0           | 0.815791                | 0.910069  | -0.045079 |
| 9             | 1             | 0           | 0.480009                | -0.575171 | 1.556497  |
| 10            | 1             | 0           | 1.274296                | 1.629342  | 0.622583  |
| 11            | 1             | 0           | -1.965518               | 4.104548  | -1.563300 |
| 12            | 14            | 0           | -1.713494               | 1.676058  | -1.359770 |
| 13            | 6             | 0           | -3.474596               | 1.124237  | -1.152230 |
| 14            | 6             | 0           | -1.402045               | 3.447849  | -0.894387 |
| 15            | 6             | 0           | -0.986036               | 1.203700  | -3.005231 |
| 16            | 1             | 0           | 0.080467                | 1.418259  | -3.100526 |
| 17            | 1             | 0           | -1.491098               | 1.812182  | -3.763263 |
| 18            | 1             | 0           | -1.165759               | 0.161391  | -3.276766 |
| 19            | 1             | 0           | -3.598207               | 0.061633  | -1.374193 |
| 20            | 1             | 0           | -4.113264               | 1.679206  | -1.845431 |
| 21            | 1             | 0           | -3.847133               | 1.315031  | -0.143244 |
| 22            | 1             | 0           | -0.346766               | 3.715229  | -0.986982 |
| 23            | 1             | 0           | -1.727801               | 3.664639  | 0.125594  |

M062X/6-311+G\*\* Optimized Structure and Energy of Cation **47a**

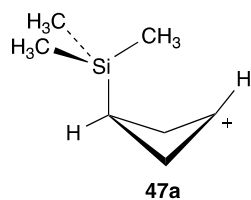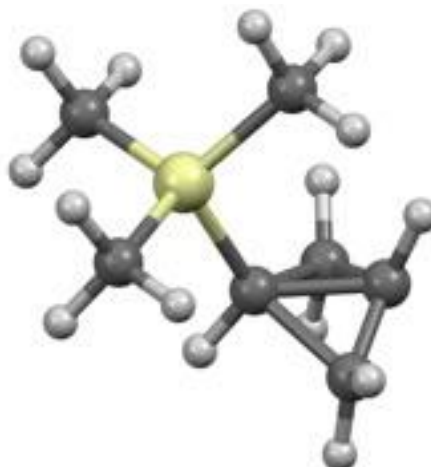

E(RM062X) = -564.9029481  
 Zero-point correction = 0.199966 au  
 No imaginary frequencies

| Center Number | Atomic Number | Atomic Type | Coordinates (Angstroms) |           |           |
|---------------|---------------|-------------|-------------------------|-----------|-----------|
|               |               |             | X                       | Y         | Z         |
| 1             | 6             | 0           | -1.156236               | 0.000065  | 1.162303  |
| 2             | 6             | 0           | -1.459308               | -1.185726 | 0.022351  |
| 3             | 1             | 0           | -0.859216               | -2.086473 | 0.071203  |
| 4             | 1             | 0           | 0.234849                | 0.002315  | -0.629146 |
| 5             | 1             | 0           | -2.530196               | -1.318880 | -0.069893 |
| 6             | 14            | 0           | 0.327066                | -0.000156 | 2.415484  |
| 7             | 1             | 0           | -2.142247               | -0.000338 | 1.620115  |
| 8             | 6             | 0           | -1.460556               | 1.187592  | 0.023855  |
| 9             | 6             | 0           | -0.834118               | 0.001616  | -0.440123 |
| 10            | 1             | 0           | -0.861467               | 2.088927  | 0.074174  |
| 11            | 1             | 0           | -2.531620               | 1.319635  | -0.067920 |
| 12            | 6             | 0           | 0.110222                | 1.558184  | 3.412200  |
| 13            | 6             | 0           | 0.109419                | -1.558367 | 3.412206  |
| 14            | 6             | 0           | 1.900024                | -0.000618 | 1.408594  |
| 15            | 1             | 0           | 2.002175                | -0.890935 | 0.781387  |
| 16            | 1             | 0           | 2.755885                | -0.001203 | 2.089475  |
| 17            | 1             | 0           | 2.003057                | 0.889898  | 0.781819  |
| 18            | 1             | 0           | 0.195680                | -2.457486 | 2.797238  |
| 19            | 1             | 0           | -0.856609               | -1.582438 | 3.922323  |
| 20            | 1             | 0           | 0.884428                | -1.616703 | 4.181177  |
| 21            | 1             | 0           | -0.855610               | 1.582526  | 3.922677  |
| 22            | 1             | 0           | 0.196510                | 2.457270  | 2.797188  |
| 23            | 1             | 0           | 0.885534                | 1.616327  | 4.180881  |

M062X/6-311+G\*\* Optimized Structure and Energy of Cation **47b**

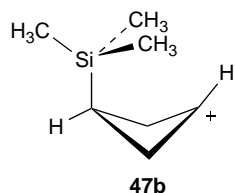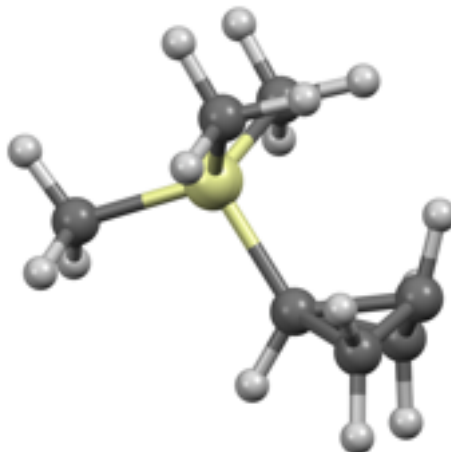

E(RM062X) = -564.9034249  
 Zero-point correction = 0.199807 au  
 No imaginary frequencies

| Cent er<br>Number | At omic<br>Number | At omic<br>Type | Coor di nat es ( Angst r om s) |           |           |
|-------------------|-------------------|-----------------|--------------------------------|-----------|-----------|
|                   |                   |                 | X                              | Y         | Z         |
| 1                 | 6                 | 0               | -1.167352                      | 0.034046  | 1.154173  |
| 2                 | 6                 | 0               | -2.314115                      | -1.179019 | 1.031160  |
| 3                 | 1                 | 0               | -2.337892                      | -1.912504 | 1.827808  |
| 4                 | 1                 | 0               | -0.405508                      | -1.910791 | 0.294300  |
| 5                 | 1                 | 0               | -3.260320                      | -0.742869 | 0.735435  |
| 6                 | 14                | 0               | 0.308385                       | 0.013642  | 2.421046  |
| 7                 | 1                 | 0               | -1.859109                      | 0.870383  | 1.211283  |
| 8                 | 6                 | 0               | -0.976222                      | 0.027193  | -0.506778 |
| 9                 | 6                 | 0               | -1.227247                      | -1.221634 | 0.119736  |
| 10                | 1                 | 0               | 0.021396                       | 0.213506  | -0.885232 |
| 11                | 1                 | 0               | -1.786365                      | 0.585168  | -0.959903 |
| 12                | 6                 | 0               | 0.110439                       | 1.550543  | 3.449027  |
| 13                | 6                 | 0               | 0.107622                       | -1.564346 | 3.397815  |
| 14                | 6                 | 0               | 1.859520                       | 0.009321  | 1.382555  |
| 15                | 1                 | 0               | 1.937880                       | -0.866146 | 0.731154  |
| 16                | 1                 | 0               | 2.734167                       | -0.012841 | 2.038503  |
| 17                | 1                 | 0               | 1.945633                       | 0.909405  | 0.768480  |
| 18                | 1                 | 0               | 0.160516                       | -2.463410 | 2.776677  |
| 19                | 1                 | 0               | -0.829821                      | -1.583542 | 3.959517  |
| 20                | 1                 | 0               | 0.917597                       | -1.643771 | 4.128134  |
| 21                | 1                 | 0               | -0.838713                      | 1.555735  | 3.990503  |
| 22                | 1                 | 0               | 0.165127                       | 2.455329  | 2.838712  |
| 23                | 1                 | 0               | 0.910437                       | 1.608718  | 4.191662  |



M062X/6-311+G\*\* Optimized Structure and Energy of  
Transition State for Inversion of Cation **47** to Cation **37**

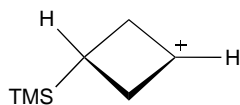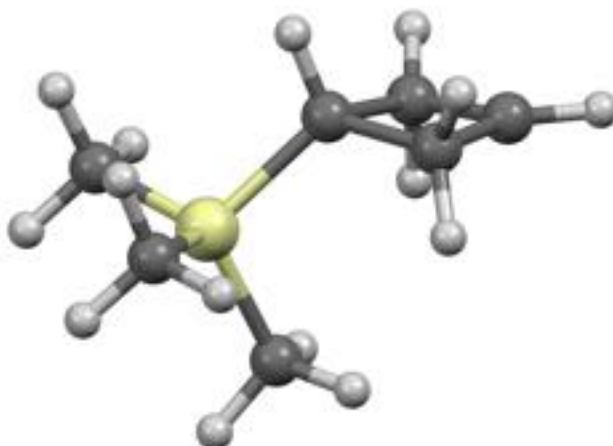

E(RM062X) = -564.8633430  
Zero-point correction = 0.195005 au  
One imaginary frequency at -227.79 cm<sup>-1</sup>

| Cent er<br>Number | At om i c<br>Number | At om i c<br>Type | Coor di nat es ( Angst r om s ) |           |           |
|-------------------|---------------------|-------------------|---------------------------------|-----------|-----------|
|                   |                     |                   | X                               | Y         | Z         |
| 1                 | 1                   | 0                 | 1.088498                        | 0.949581  | -0.922379 |
| 2                 | 6                   | 0                 | -0.779022                       | -0.736072 | 0.030412  |
| 3                 | 1                   | 0                 | -1.226755                       | -1.328498 | 0.847004  |
| 4                 | 6                   | 0                 | 0.664678                        | -0.643868 | 0.191265  |
| 5                 | 1                   | 0                 | -1.092816                       | -1.253253 | -0.890887 |
| 6                 | 6                   | 0                 | -0.864833                       | 0.820548  | 0.104760  |
| 7                 | 1                   | 0                 | -1.246471                       | 1.131395  | 1.079268  |
| 8                 | 6                   | 0                 | 0.699514                        | 0.793968  | 0.117667  |
| 9                 | 1                   | 0                 | 1.439142                        | -1.396824 | 0.347804  |
| 10                | 1                   | 0                 | 1.364155                        | 1.373745  | 0.764177  |
| 11                | 1                   | 0                 | -2.033276                       | 4.167055  | -1.778124 |
| 12                | 14                  | 0                 | -1.751901                       | 1.757132  | -1.317563 |
| 13                | 6                   | 0                 | -3.521676                       | 1.163770  | -1.321164 |
| 14                | 6                   | 0                 | -1.583263                       | 3.582396  | -0.971874 |
| 15                | 6                   | 0                 | -0.859644                       | 1.272794  | -2.898102 |
| 16                | 1                   | 0                 | 0.142802                        | 1.704784  | -2.970681 |
| 17                | 1                   | 0                 | -1.418235                       | 1.654924  | -3.757225 |
| 18                | 1                   | 0                 | -0.783668                       | 0.190128  | -3.040313 |
| 19                | 1                   | 0                 | -3.598992                       | 0.093380  | -1.530379 |
| 20                | 1                   | 0                 | -4.092032                       | 1.683545  | -2.095182 |
| 21                | 1                   | 0                 | -4.014301                       | 1.360536  | -0.365872 |
| 22                | 1                   | 0                 | -0.536390                       | 3.888333  | -0.895682 |
| 23                | 1                   | 0                 | -2.086994                       | 3.861984  | -0.043403 |

M062X/6-311+G\*\* Optimized Structure and Energy of Cation **52**

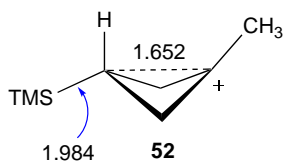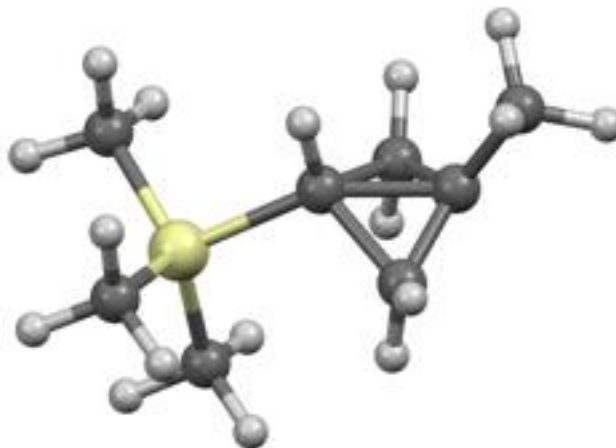

E(RM062X) = -604.2374265  
 Zero-point correction = 0.228894 au  
 One imaginary frequency at -23.62 cm<sup>-1</sup>

| Cent er<br>Number | At om i c<br>Number | At om i c<br>Type | Coor di nat es ( Angst r om s) |           |           |
|-------------------|---------------------|-------------------|--------------------------------|-----------|-----------|
|                   |                     |                   | X                              | Y         | Z         |
| 1                 | 1                   | 0                 | -0.013686                      | 0.540255  | 0.296523  |
| 2                 | 6                   | 0                 | -0.074539                      | 0.238571  | 1.336059  |
| 3                 | 6                   | 0                 | 0.586536                       | -1.150417 | 1.772033  |
| 4                 | 6                   | 0                 | -1.022972                      | -0.790480 | 1.678520  |
| 5                 | 6                   | 0                 | -0.529813                      | -1.393379 | 2.890569  |
| 6                 | 1                   | 0                 | -0.836840                      | -2.410336 | 3.107096  |
| 7                 | 1                   | 0                 | -0.329773                      | -0.766651 | 3.753768  |
| 8                 | 1                   | 0                 | 0.164785                       | 1.006047  | 2.065184  |
| 9                 | 1                   | 0                 | 0.698127                       | -1.912769 | 1.004372  |
| 10                | 6                   | 0                 | -1.904448                      | -1.481823 | 0.694569  |
| 11                | 14                  | 0                 | 2.370736                       | -0.867188 | 2.591809  |
| 12                | 6                   | 0                 | 2.215510                       | 0.434282  | 3.914253  |
| 13                | 6                   | 0                 | 2.806255                       | -2.543056 | 3.268229  |
| 14                | 6                   | 0                 | 3.423666                       | -0.326004 | 1.158570  |
| 15                | 1                   | 0                 | 4.458021                       | -0.198469 | 1.490214  |
| 16                | 1                   | 0                 | 3.092529                       | 0.630614  | 0.747585  |
| 17                | 1                   | 0                 | 3.428194                       | -1.066254 | 0.355032  |
| 18                | 1                   | 0                 | 3.812447                       | -2.516339 | 3.696023  |
| 19                | 1                   | 0                 | 2.803762                       | -3.309139 | 2.489271  |
| 20                | 1                   | 0                 | 2.122375                       | -2.852721 | 4.062014  |
| 21                | 1                   | 0                 | 3.211423                       | 0.571384  | 4.348690  |
| 22                | 1                   | 0                 | 1.557100                       | 0.147716  | 4.737063  |
| 23                | 1                   | 0                 | 1.907511                       | 1.411048  | 3.535166  |
| 24                | 1                   | 0                 | -1.948990                      | -2.555372 | 0.879440  |
| 25                | 1                   | 0                 | -1.594256                      | -1.283889 | -0.331721 |
| 26                | 1                   | 0                 | -2.911973                      | -1.075492 | 0.826045  |

M062X/6-311+G\*\* Optimized Structure and Energy of Cation **54**

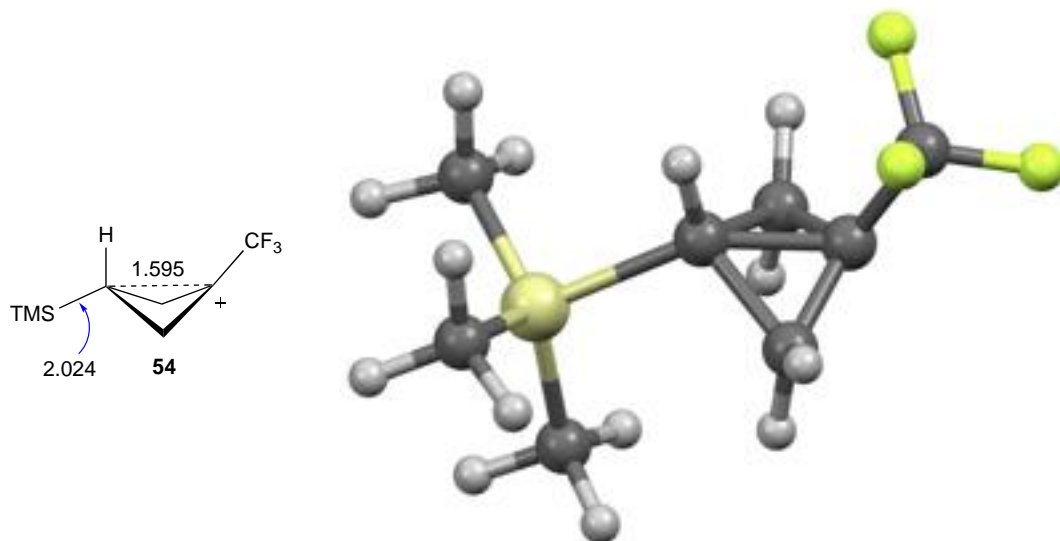

E(RM062X) = -901.9562706  
 Zero-point correction = 0.206631 au  
 No imaginary frequencies

| Cent er<br>Number | At om i c<br>Number | At om i c<br>Type | Coor di nat es ( Angst r om s) |           |           |
|-------------------|---------------------|-------------------|--------------------------------|-----------|-----------|
|                   |                     |                   | X                              | Y         | Z         |
| 1                 | 6                   | 0                 | 1.172771                       | -0.057034 | 0.669062  |
| 2                 | 6                   | 0                 | 0.346628                       | 1.093866  | 0.916971  |
| 3                 | 6                   | 0                 | 0.336978                       | -1.226201 | 0.682252  |
| 4                 | 6                   | 0                 | -0.197274                      | 0.032328  | -0.143352 |
| 5                 | 1                   | 0                 | 0.088805                       | 0.135746  | -1.188656 |
| 6                 | 1                   | 0                 | 0.670981                       | -2.090470 | 0.119917  |
| 7                 | 1                   | 0                 | -0.279452                      | -1.419037 | 1.553444  |
| 8                 | 1                   | 0                 | 0.692216                       | 2.049774  | 0.540789  |
| 9                 | 1                   | 0                 | -0.267723                      | 1.111469  | 1.810293  |
| 10                | 14                  | 0                 | -2.220640                      | 0.018407  | -0.118888 |
| 11                | 6                   | 0                 | -2.622235                      | -1.560478 | -1.006069 |
| 12                | 1                   | 0                 | -2.156862                      | -1.603095 | -1.993545 |
| 13                | 1                   | 0                 | -3.704468                      | -1.623793 | -1.154306 |
| 14                | 1                   | 0                 | -2.319438                      | -2.443180 | -0.438175 |
| 15                | 6                   | 0                 | -2.629521                      | 1.565016  | -1.057977 |
| 16                | 1                   | 0                 | -2.265193                      | 2.461534  | -0.551200 |
| 17                | 1                   | 0                 | -3.716562                      | 1.656426  | -1.143761 |
| 18                | 1                   | 0                 | -2.223531                      | 1.546701  | -2.071879 |
| 19                | 6                   | 0                 | -2.770249                      | 0.048818  | 1.655577  |
| 20                | 1                   | 0                 | -2.569935                      | 0.999869  | 2.153372  |
| 21                | 1                   | 0                 | -2.371070                      | -0.764644 | 2.265375  |
| 22                | 1                   | 0                 | -3.858438                      | -0.077507 | 1.652444  |
| 23                | 6                   | 0                 | 2.463313                       | 0.017937  | -0.131981 |
| 24                | 9                   | 0                 | 2.538871                       | 1.168849  | -0.794238 |
| 25                | 9                   | 0                 | 2.529705                       | -0.978472 | -1.010591 |
| 26                | 9                   | 0                 | 3.483567                       | -0.070680 | 0.703770  |

M062X/6-311+G\*\* Optimized Structure and Energy of  
3-Trimethylsilyl-1-cyanocyclobutyl Cation, **74b**

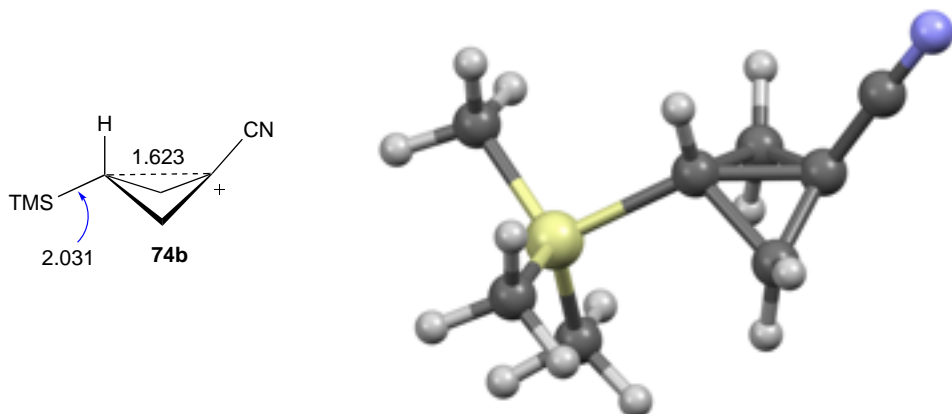

E(RM062X) = -657.1326325  
Zero-point correction = 0.199579 au  
No imaginary frequencies

| Cent er<br>Number | At omi c<br>Number | At omi c<br>Type | Coor di nat es ( Angs t r oms) |           |           |
|-------------------|--------------------|------------------|--------------------------------|-----------|-----------|
|                   |                    |                  | X                              | Y         | Z         |
| 1                 | 14                 | 0                | 0.067399                       | 0.022490  | -1.632635 |
| 2                 | 6                  | 0                | 0.320286                       | 0.026839  | 0.382807  |
| 3                 | 6                  | 0                | -0.726369                      | -0.956591 | 1.068678  |
| 4                 | 6                  | 0                | -0.351201                      | 1.335082  | 0.994751  |
| 5                 | 6                  | 0                | -0.324835                      | 0.181672  | 1.864441  |
| 6                 | 1                  | 0                | -1.688843                      | -0.915675 | 0.569502  |
| 7                 | 6                  | 0                | 0.546127                       | 0.076710  | 2.998407  |
| 8                 | 1                  | 0                | 1.380203                       | -0.140216 | 0.555945  |
| 9                 | 1                  | 0                | 0.289332                       | 2.171236  | 1.250359  |
| 10                | 1                  | 0                | -1.280548                      | 1.572893  | 0.487625  |
| 11                | 1                  | 0                | -0.384091                      | -1.934633 | 1.386487  |
| 12                | 7                  | 0                | 1.214839                       | -0.001538 | 3.928309  |
| 13                | 6                  | 0                | 1.006118                       | 1.535741  | -2.151599 |
| 14                | 6                  | 0                | 0.851658                       | -1.589231 | -2.110843 |
| 15                | 6                  | 0                | -1.756774                      | 0.106906  | -1.970213 |
| 16                | 1                  | 0                | 0.325870                       | -2.445220 | -1.681791 |
| 17                | 1                  | 0                | 1.901417                       | -1.637197 | -1.812982 |
| 18                | 1                  | 0                | 0.816506                       | -1.695763 | -3.199440 |
| 19                | 1                  | 0                | 2.039517                       | 1.516542  | -1.797799 |
| 20                | 1                  | 0                | 0.532960                       | 2.456585  | -1.803037 |
| 21                | 1                  | 0                | 1.038035                       | 1.579535  | -3.244615 |
| 22                | 1                  | 0                | -2.290879                      | -0.802924 | -1.688519 |
| 23                | 1                  | 0                | -1.873951                      | 0.212948  | -3.054438 |
| 24                | 1                  | 0                | -2.257572                      | 0.969112  | -1.524409 |

M062X/6-311+G\*\* Optimized Structure and Energy of Cation **74c**

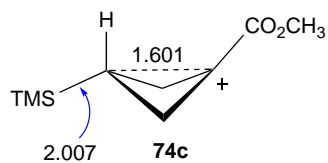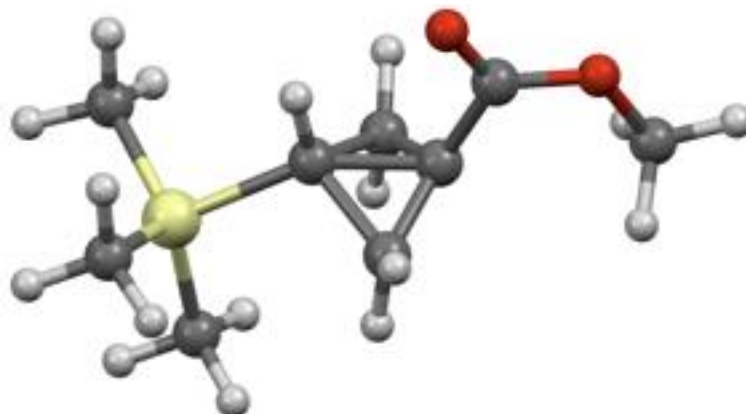

E(RM062X) = -792.7590508  
 Zero-point correction = 0.244226 au  
 No imaginary frequencies

| Center Number | Atomic Number | Atomic Type | Coordinates (Angstroms) |           |           |
|---------------|---------------|-------------|-------------------------|-----------|-----------|
|               |               |             | X                       | Y         | Z         |
| 1             | 6             | 0           | -0.278170               | 0.272264  | -0.167135 |
| 2             | 6             | 0           | 0.438216                | -1.097263 | -0.556390 |
| 3             | 6             | 0           | 0.375823                | 0.323785  | 1.284632  |
| 4             | 6             | 0           | 1.214474                | -0.161796 | 0.217477  |
| 5             | 1             | 0           | 0.607828                | 1.301529  | 1.693288  |
| 6             | 1             | 0           | -0.096348               | -0.384970 | 1.957498  |
| 7             | 1             | 0           | -0.026599               | -1.944777 | -0.061697 |
| 8             | 14            | 0           | -2.259385               | -0.009856 | -0.018087 |
| 9             | 1             | 0           | -0.124217               | 1.131070  | -0.818557 |
| 10            | 1             | 0           | 0.715201                | -1.239569 | -1.595568 |
| 11            | 6             | 0           | -2.744556               | -0.415485 | -1.763980 |
| 12            | 1             | 0           | -2.343696               | -1.379201 | -2.086993 |
| 13            | 1             | 0           | -2.413639               | 0.352993  | -2.466159 |
| 14            | 1             | 0           | -3.834552               | -0.474670 | -1.833881 |
| 15            | 6             | 0           | -2.853995               | 1.638705  | 0.592967  |
| 16            | 1             | 0           | -2.476258               | 1.863493  | 1.593076  |
| 17            | 1             | 0           | -3.946433               | 1.633403  | 0.648913  |
| 18            | 1             | 0           | -2.564661               | 2.449807  | -0.079034 |
| 19            | 6             | 0           | -2.561837               | -1.398083 | 1.182616  |
| 20            | 1             | 0           | -2.273388               | -1.155422 | 2.207504  |
| 21            | 1             | 0           | -2.100802               | -2.345590 | 0.895644  |
| 22            | 1             | 0           | -3.642658               | -1.575381 | 1.199611  |
| 23            | 6             | 0           | 2.325786                | 0.702972  | -0.387492 |
| 24            | 8             | 0           | 2.071243                | 1.705894  | -0.978706 |
| 25            | 8             | 0           | 3.551511                | 0.260784  | -0.193813 |
| 26            | 6             | 0           | 3.799085                | -0.948240 | 0.544246  |
| 27            | 1             | 0           | 3.369271                | -1.808888 | 0.029770  |
| 28            | 1             | 0           | 3.412728                | -0.866928 | 1.561588  |
| 29            | 1             | 0           | 4.880033                | -1.044937 | 0.573494  |



M062X/6-311+G\*\* Optimized Structure and Energy of Cation **74d**

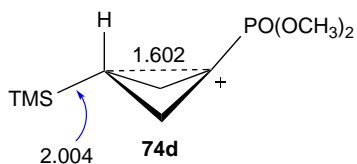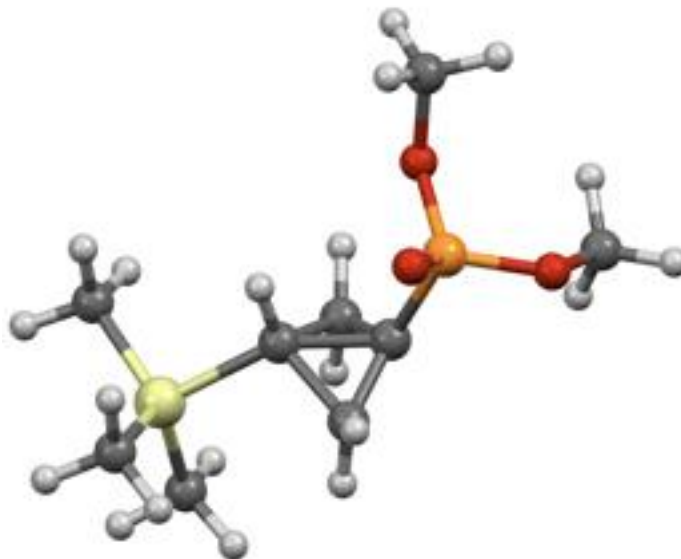

E(RM062X) = -1211.1913780  
 Zero-point correction = 0.283868 au  
 No imaginary frequencies

| Center Number | Atomic Number | Atomic Type | Coordinates (Angstroms) |           |           |
|---------------|---------------|-------------|-------------------------|-----------|-----------|
|               |               |             | X                       | Y         | Z         |
| 1             | 6             | 0           | 0.335235                | -0.937702 | -0.115669 |
| 2             | 6             | 0           | -0.675661               | -1.464921 | 0.767882  |
| 3             | 6             | 0           | -0.340873               | -0.407217 | -1.275511 |
| 4             | 6             | 0           | -0.955164               | -0.023441 | 0.143109  |
| 5             | 1             | 0           | -0.585847               | 0.854269  | 0.670257  |
| 6             | 1             | 0           | 0.165248                | 0.373068  | -1.831888 |
| 7             | 1             | 0           | -1.017621               | -1.048595 | -1.831126 |
| 8             | 1             | 0           | -0.433383               | -1.505120 | 1.825118  |
| 9             | 1             | 0           | -1.380876               | -2.198977 | 0.392179  |
| 10            | 14            | 0           | -2.937288               | 0.231843  | -0.010280 |
| 11            | 6             | 0           | -3.058383               | 1.886361  | -0.844750 |
| 12            | 1             | 0           | -2.570783               | 2.671971  | -0.263436 |
| 13            | 1             | 0           | -4.110796               | 2.164445  | -0.952435 |
| 14            | 1             | 0           | -2.619498               | 1.869575  | -1.845133 |
| 15            | 6             | 0           | -3.496081               | 0.215684  | 1.759617  |
| 16            | 1             | 0           | -3.372671               | -0.769101 | 2.216114  |
| 17            | 1             | 0           | -4.558559               | 0.470580  | 1.808857  |
| 18            | 1             | 0           | -2.954224               | 0.946733  | 2.363895  |
| 19            | 6             | 0           | -3.647595               | -1.153065 | -1.028934 |
| 20            | 1             | 0           | -3.460084               | -2.148258 | -0.620484 |
| 21            | 1             | 0           | -3.326931               | -1.129427 | -2.072430 |
| 22            | 1             | 0           | -4.734846               | -1.020637 | -1.033128 |
| 23            | 15            | 0           | 1.897156                | -0.296942 | 0.605138  |
| 24            | 8             | 0           | 1.722117                | 0.009142  | 2.025229  |
| 25            | 8             | 0           | 2.167148                | 0.913745  | -0.391037 |
| 26            | 8             | 0           | 2.956143                | -1.419527 | 0.284281  |
| 27            | 6             | 0           | 3.108421                | 1.955089  | -0.020115 |
| 28            | 1             | 0           | 4.122763                | 1.555307  | -0.032971 |
| 29            | 1             | 0           | 2.864100                | 2.334585  | 0.971657  |
| 30            | 1             | 0           | 3.002341                | 2.734592  | -0.768475 |
| 31            | 6             | 0           | 3.421310                | -1.721891 | -1.046216 |
| 32            | 1             | 0           | 4.209356                | -2.459066 | -0.924882 |
| 33            | 1             | 0           | 3.811712                | -0.822567 | -1.522492 |
| 34            | 1             | 0           | 2.609208                | -2.143525 | -1.641956 |

B3LYP/6-31G\* Optimized Structure and NMR Shifts of 17

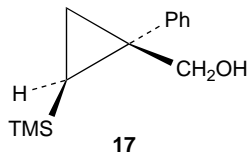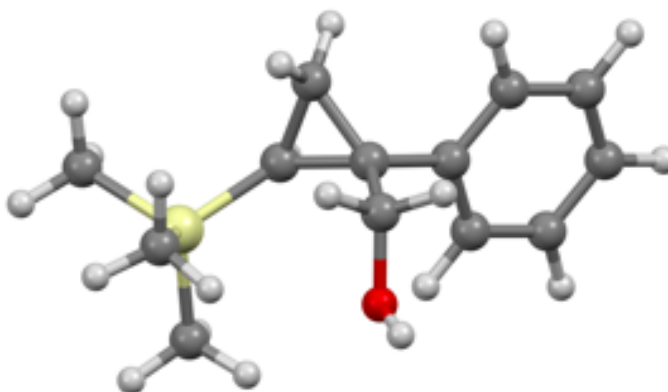

| Coordinates (Angstroms) |           |           |           | NMR shifts (ppm) |           |            |
|-------------------------|-----------|-----------|-----------|------------------|-----------|------------|
|                         |           |           |           | Atom             | Isotropic | Rel. Shift |
| H                       | 0.330211  | -2.352992 | 1.167969  | H1               | 31.0659   | 1.12       |
| C                       | -0.267625 | -1.862993 | 0.403822  | C1               | 173.0564  | 16.57      |
| C                       | -0.768319 | -0.454599 | 0.681700  | C2               | 175.3786  | 14.25      |
| C                       | 0.343514  | -0.699541 | -0.338607 | C3               | 155.0499  | 34.58      |
| H                       | -0.910040 | -2.543248 | -0.152436 | H2               | 31.4657   | 0.72       |
| H                       | -0.366847 | -0.053267 | 1.615312  | H3               | 32.0929   | 0.09       |
| C                       | 1.740365  | -0.253868 | 0.019086  | C4               | 49.2770   | 140.35     |
| C                       | 4.362433  | 0.593552  | 0.598077  | C5               | 70.1136   | 119.51     |
| C                       | 2.784759  | -1.180435 | 0.137152  | C6               | 68.5570   | 121.07     |
| C                       | 2.032551  | 1.107330  | 0.188651  | C7               | 63.1759   | 126.45     |
| C                       | 3.331047  | 1.527477  | 0.477213  | C8               | 68.7027   | 120.92     |
| C                       | 4.085524  | -0.763241 | 0.425696  | C9               | 69.0199   | 120.61     |
| H                       | 2.574602  | -2.239145 | 0.003304  | H5               | 25.0589   | 7.13       |
| H                       | 1.233553  | 1.835747  | 0.088276  | H7               | 24.4492   | 7.73       |
| H                       | 3.537878  | 2.586683  | 0.609361  | H8               | 25.0079   | 7.18       |
| H                       | 4.881015  | -1.498680 | 0.517046  | H9               | 25.0582   | 7.13       |
| H                       | 5.373563  | 0.921238  | 0.825689  | H10              | 25.0972   | 7.09       |
| C                       | 0.024865  | -0.581032 | -1.817938 | C10              | 119.3443  | 70.28      |
| H                       | -0.866986 | -1.175762 | -2.058394 | H11              | 28.7654   | 3.42       |
| H                       | 0.866573  | -0.987933 | -2.398557 | H12              | 28.1888   | 4.00       |
| O                       | -0.188551 | 0.795646  | -2.142944 | O1               | 294.6181  |            |
| H                       | -0.178508 | 0.880273  | -3.108388 | H6               | 31.9855   | 0.20       |
| Si                      | -2.527444 | 0.179950  | 0.407410  | Si 1             | 407.6115  | 6.07       |
| C                       | -3.558930 | -0.427557 | 1.880485  | C11              | 189.1555  | 0.47       |
| H                       | -4.590523 | -0.058776 | 1.821763  | H13              | 32.1806   | 0.00       |
| H                       | -3.139920 | -0.085313 | 2.834674  | H15              | 32.0755   | 0.11       |
| H                       | -3.599475 | -1.523166 | 1.912893  | H16              | 32.0119   | 0.17       |
| C                       | -2.492157 | 2.070944  | 0.392252  | C12              | 189.9673  | -0.34      |
| H                       | -3.498088 | 2.490454  | 0.267294  | H14              | 32.1131   | 0.07       |
| H                       | -1.866685 | 2.425841  | -0.434191 | H17              | 31.3417   | 0.84       |
| H                       | -2.079731 | 2.471327  | 1.326471  | H18              | 31.9491   | 0.24       |
| C                       | -3.331472 | -0.451785 | -1.188477 | C13              | 191.3329  | -1.71      |
| H                       | -4.390676 | -0.166309 | -1.207605 | H4               | 32.2723   | -0.09      |
| H                       | -3.285669 | -1.543895 | -1.276150 | H19              | 32.2053   | -0.02      |
| H                       | -2.850965 | -0.013055 | -2.069191 | H20              | 32.0495   | 0.13       |

Calculated (Rel. Shift)<sub>average</sub> = 0.16 ppm  
 Observed TMS Shift in 17 = 0.14 ppm



# B3LYP/6-31G\* Optimized Structure and NMR Shifts of 18

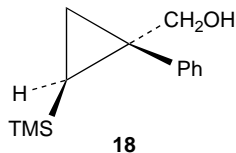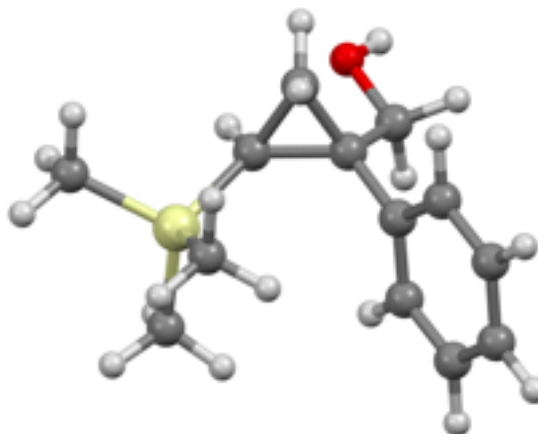

| Coordinates (Angstroms) |           |           |           | NMR shifts (ppm) |           |            |
|-------------------------|-----------|-----------|-----------|------------------|-----------|------------|
|                         |           |           |           | Atom             | Isotropic | Rel. Shift |
| H                       | -0.459603 | -0.670874 | -2.193903 | H1               | 31.3902   | 0.79       |
| C                       | -0.653335 | -1.378395 | -1.391662 | C1               | 178.1822  | 11.44      |
| C                       | 0.194768  | -1.287485 | -0.156653 | C2               | 156.7543  | 32.87      |
| C                       | -1.264102 | -0.841318 | -0.098709 | C3               | 179.1350  | 10.49      |
| H                       | -0.958954 | -2.366952 | -1.721373 | H2               | 30.7012   | 1.48       |
| H                       | -1.892334 | -1.582537 | 0.397735  | H6               | 31.3296   | 0.85       |
| Si                      | -1.972175 | 0.902837  | 0.033447  | Si 1             | 408.0626  | 5.62       |
| C                       | -3.789548 | 0.786049  | -0.500659 | C4               | 188.8410  | 0.79       |
| H                       | -4.357248 | 0.108556  | 0.148827  | H7               | 32.0571   | 0.13       |
| H                       | -3.880623 | 0.412571  | -1.527509 | H9               | 32.0218   | 0.16       |
| H                       | -4.275349 | 1.768813  | -0.459733 | H10              | 32.3201   | -0.14      |
| C                       | -1.921562 | 1.533741  | 1.822939  | C5               | 190.1843  | -0.56      |
| H                       | -2.324024 | 0.790069  | 2.521853  | H8               | 32.0229   | 0.16       |
| H                       | -2.526400 | 2.443231  | 1.926506  | H11              | 32.2949   | -0.11      |
| H                       | -0.902361 | 1.778190  | 2.142592  | H12              | 32.0330   | 0.15       |
| C                       | -1.089237 | 2.141178  | -1.095925 | C6               | 192.8797  | -3.25      |
| H                       | -1.128133 | 1.833418  | -2.147780 | H5               | 32.6855   | -0.50      |
| H                       | -0.036399 | 2.272392  | -0.825472 | H13              | 33.5699   | -1.39      |
| H                       | -1.577286 | 3.121821  | -1.026896 | H14              | 32.8008   | -0.62      |
| C                       | 1.331987  | -0.301492 | -0.076593 | C7               | 52.5000   | 137.13     |
| C                       | 3.527201  | 1.454899  | 0.130078  | C8               | 69.8573   | 119.77     |
| C                       | 2.139966  | -0.026589 | -1.187981 | C9               | 66.2786   | 123.35     |
| C                       | 1.655735  | 0.308443  | 1.145925  | C10              | 65.2412   | 124.39     |
| C                       | 2.739354  | 1.180533  | 1.250232  | C11              | 68.7862   | 120.84     |
| C                       | 3.224192  | 0.847699  | -1.089200 | C12              | 68.0000   | 121.63     |
| H                       | 1.913566  | -0.500567 | -2.139297 | H3               | 24.9722   | 7.21       |
| H                       | 1.043708  | 0.100035  | 2.019970  | H15              | 24.7587   | 7.43       |
| H                       | 2.967584  | 1.647356  | 2.205065  | H16              | 25.0152   | 7.17       |
| H                       | 3.833956  | 1.051898  | -1.965763 | H17              | 25.0059   | 7.18       |
| H                       | 4.370338  | 2.136291  | 0.207721  | H18              | 25.0781   | 7.11       |
| C                       | 0.557925  | -2.596124 | 0.546417  | C13              | 124.4177  | 65.21      |
| H                       | 0.801556  | -2.385445 | 1.600606  | H19              | 28.1768   | 4.01       |
| H                       | 1.467721  | -3.004676 | 0.075756  | H20              | 8.3884    | 3.80       |
| O                       | -0.519291 | -3.521565 | 0.454040  | O1               | 298.9423  |            |
| H                       | -0.234988 | -4.347615 | 0.871254  | H4               | 32.1347   | 0.05       |

Calculated (Rel. Shift)<sub>average</sub> = -0.23 ppm  
 Observed TMS Shift in 18 = -0.30 ppm
